# Supplementary material
Source: Springer Nature journal article supplement (https://www.springermedizin.de/resource/supplementary/12960_2013_457_MOESM3_ESM.pdf/9570130)
Supplement: MOESM3 [file 9570130]

Program Description

PROCESS EVALUATION

Implementation Assessment

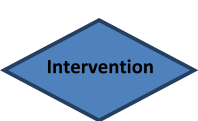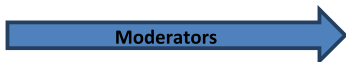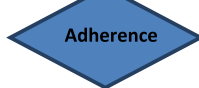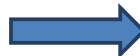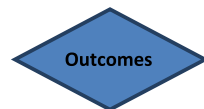

**CHW Program**

MVP Model

Kenyan National Model

**CHW Policy**

1. Complexity
2. Comprehensiveness

**Support Strategies**

3. Training
4. Management & Supervision

**Quality of Delivery**

5. Adaptation
6. Applicability

**CHW Responsiveness**

7. Recruitment of appropriate personnel
8. Clarity on task profile
9. Remuneration
10. Motivation

**Coverage**

1. CHW: Household ratio
2. Range of services provided

**Frequency**

3. Regularity of household contact

**Duration**

4. Consistency of service delivery over time

**MDG Targets**

- 1C: Under 5 malnutrition
- 4A: Under 5 mortality rate
- 5A: Maternal mortality ratio
- 5B: Access to reproductive health
- 6A: Halt/Reverse spread of HIV/AIDS
- 6C: Halt/Reverse spread of Malaria
